# Supplementary material
Source: PubMed Central journal article supplement (PMC10065960)

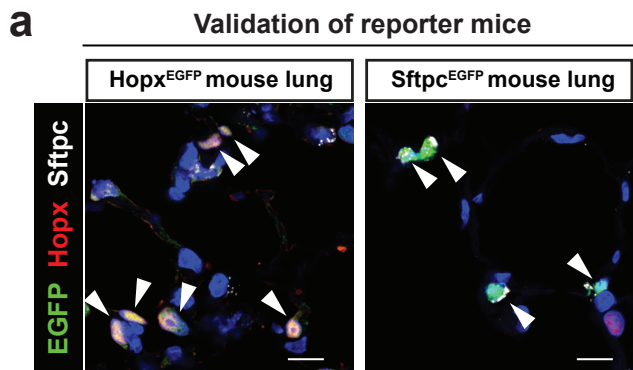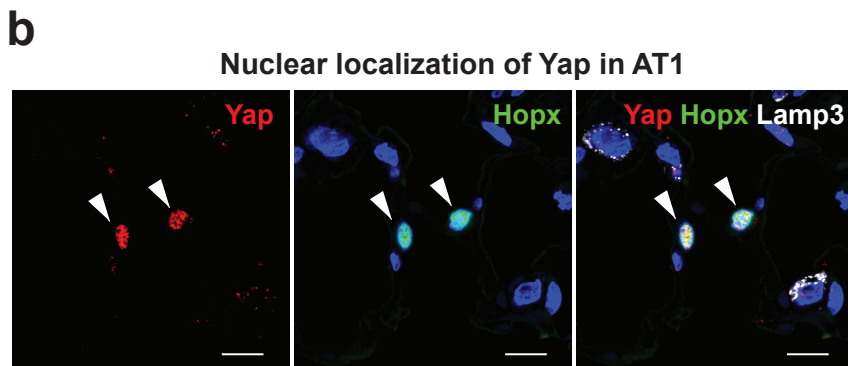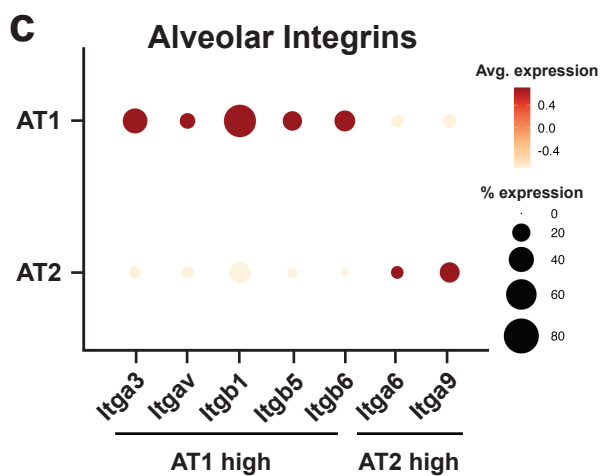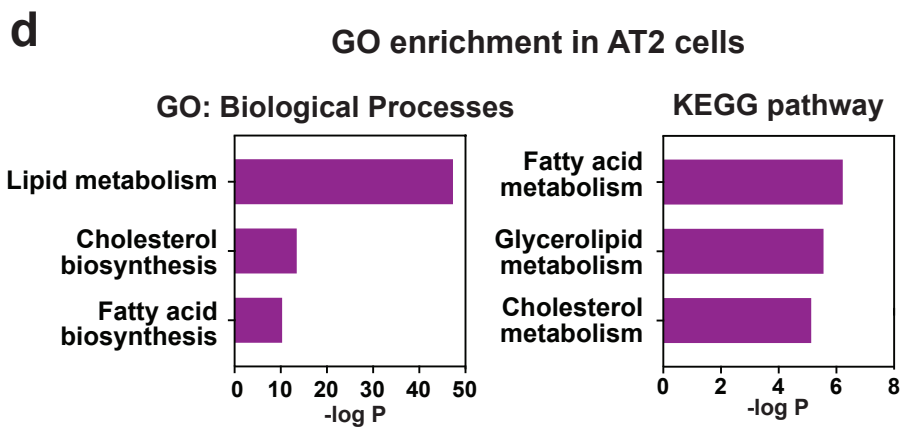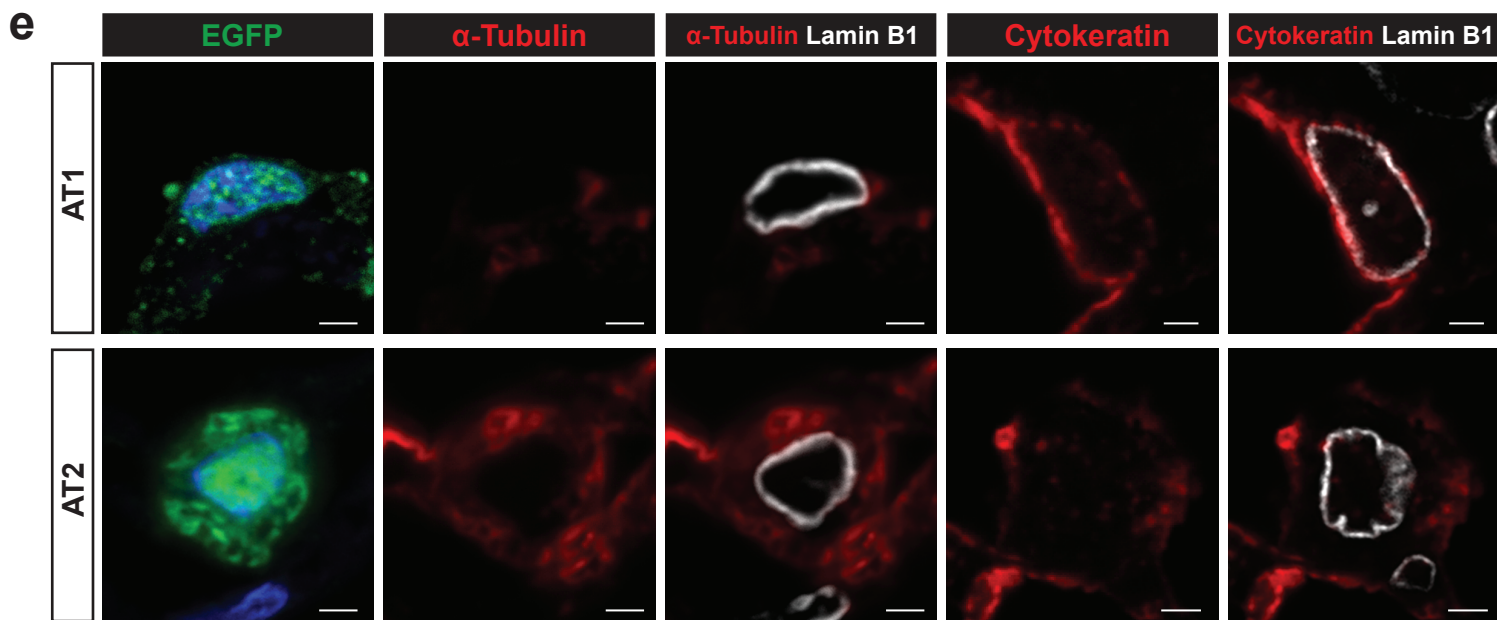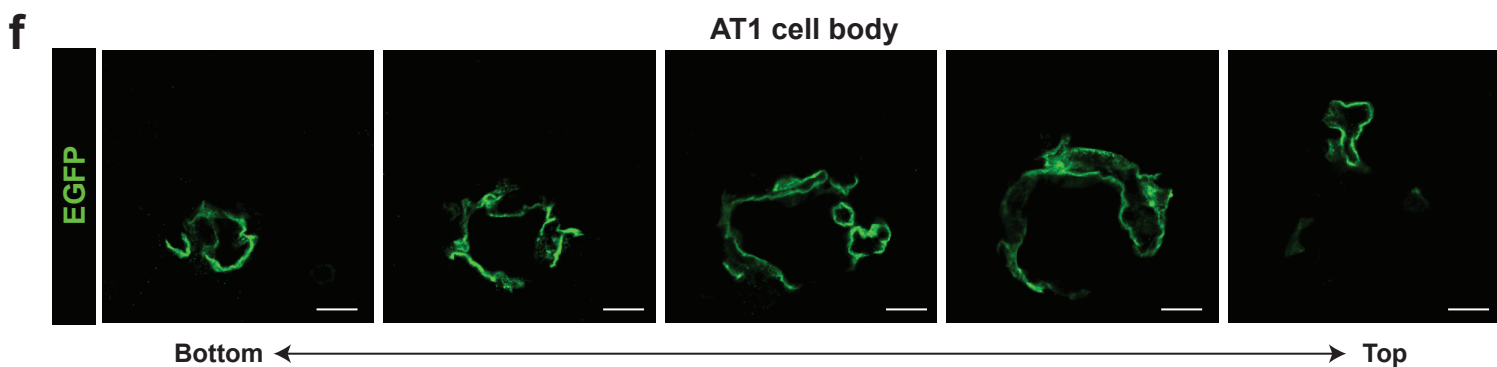

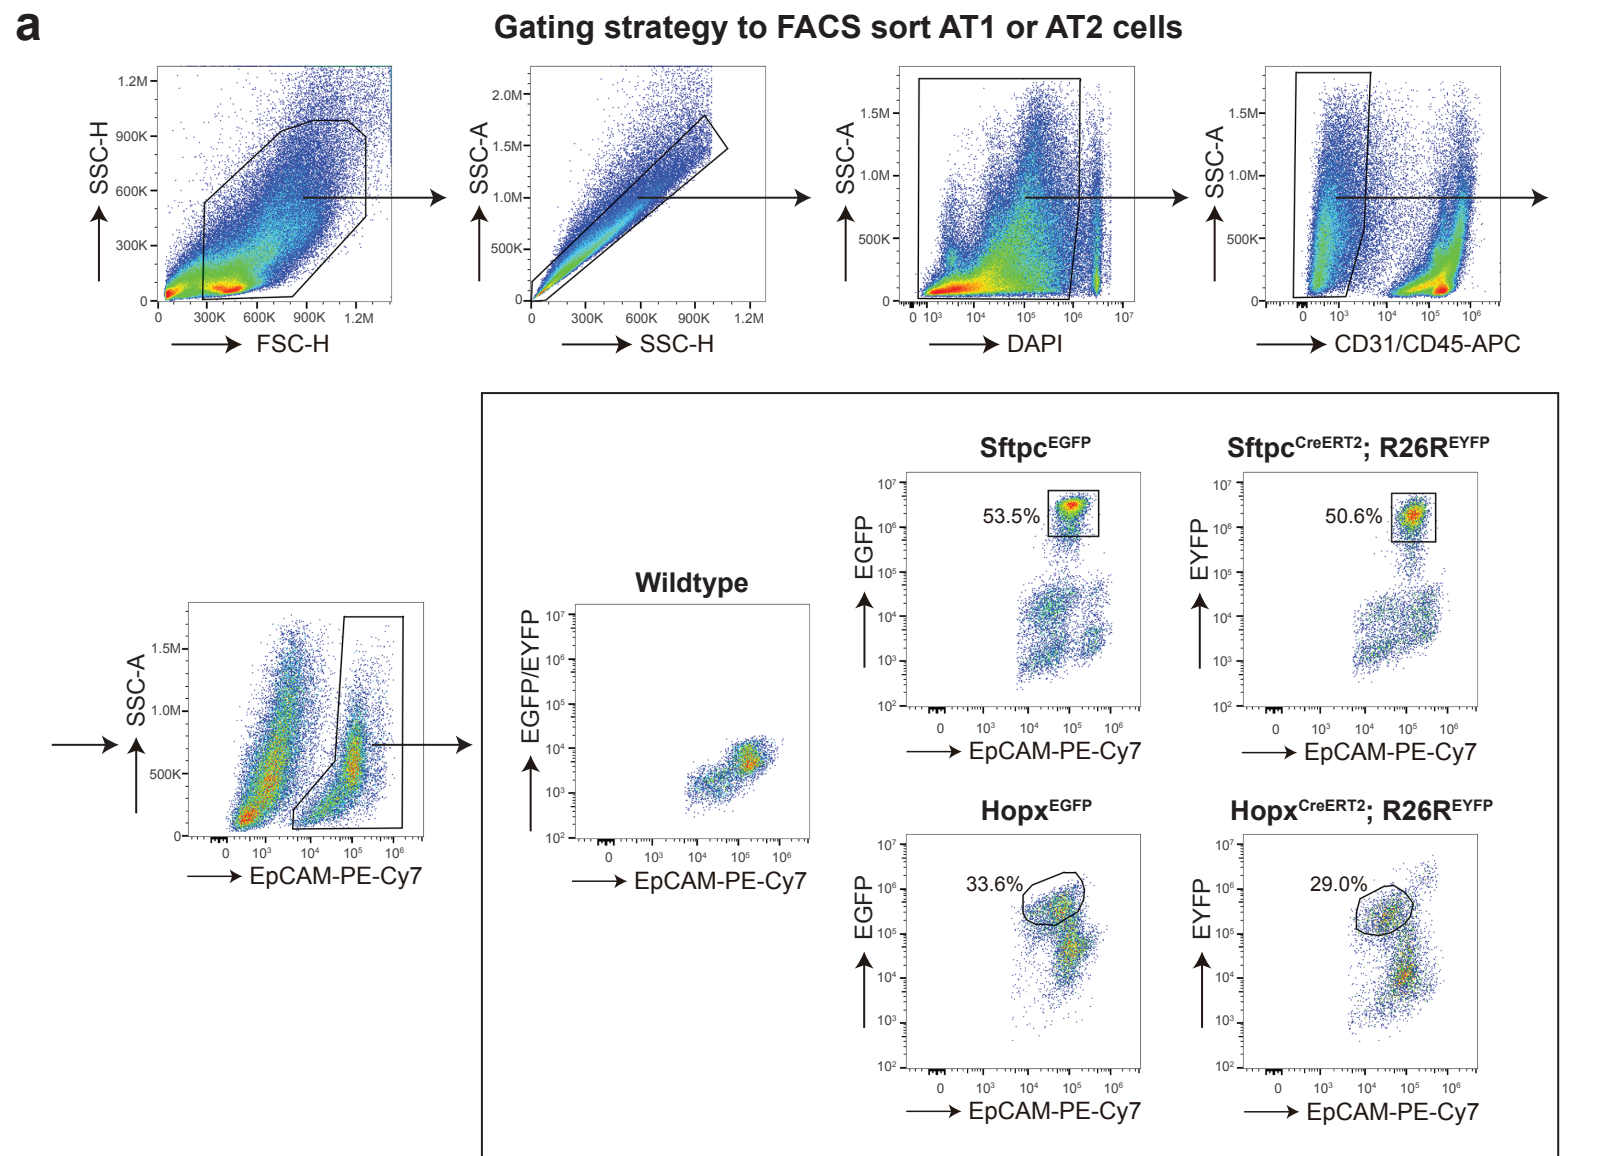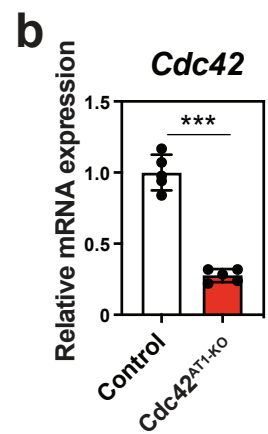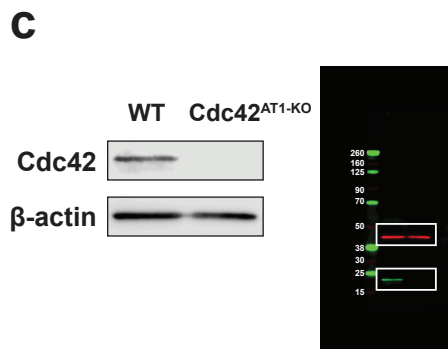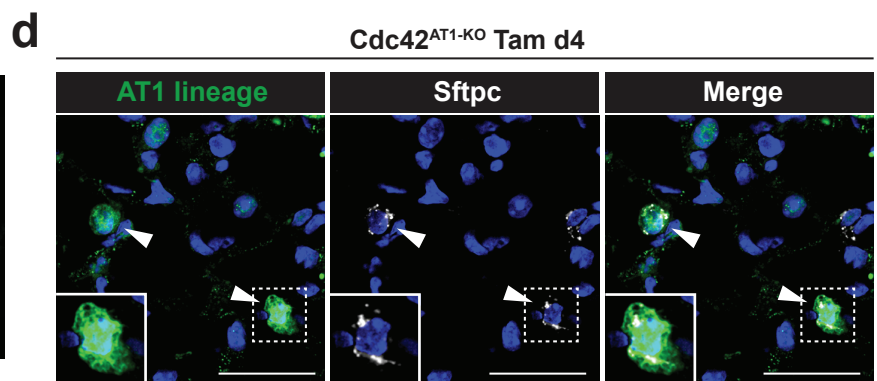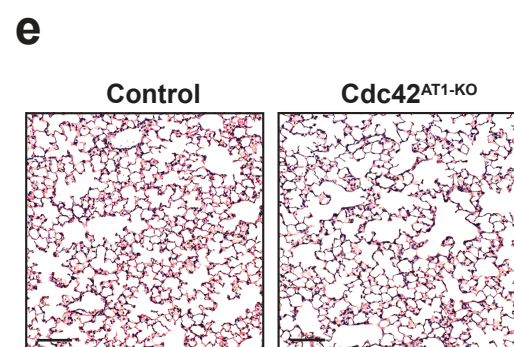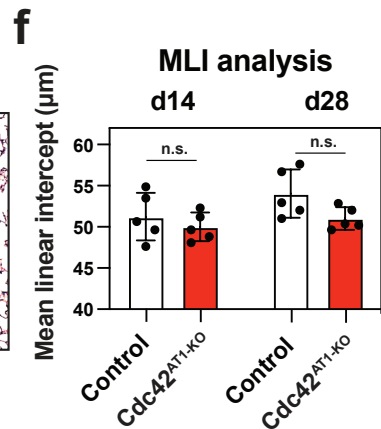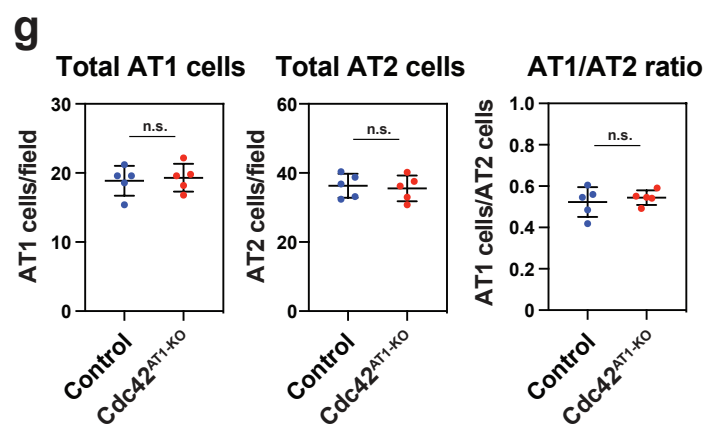



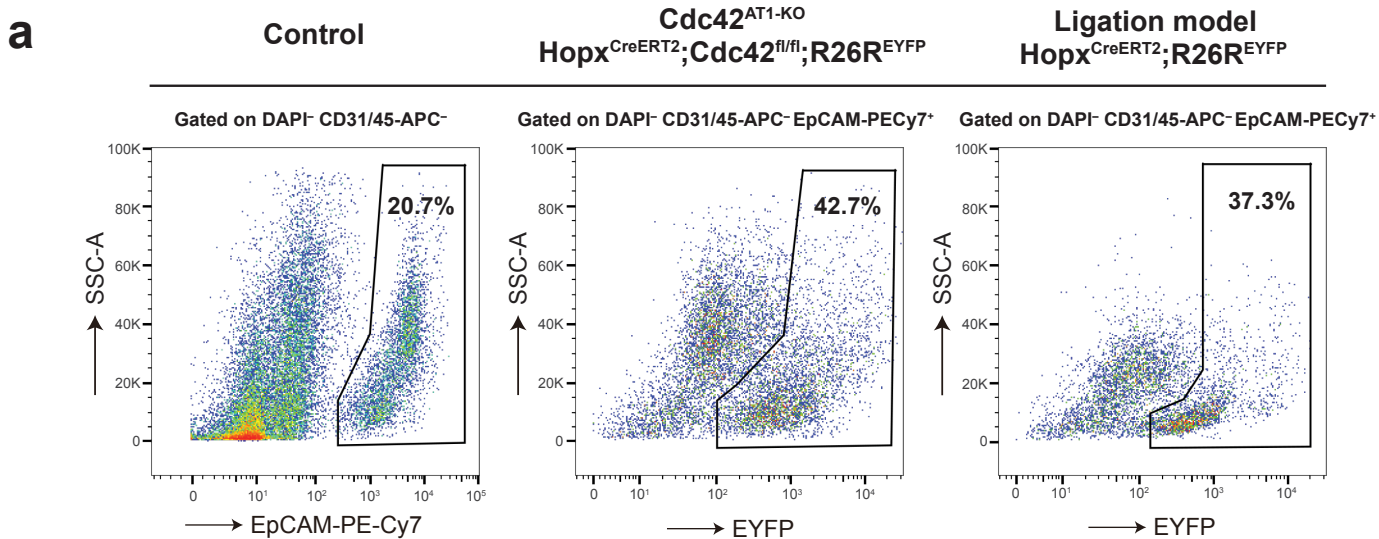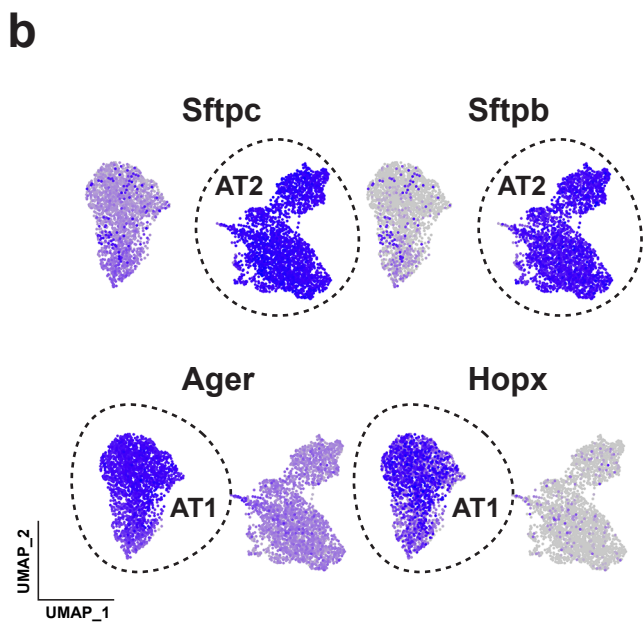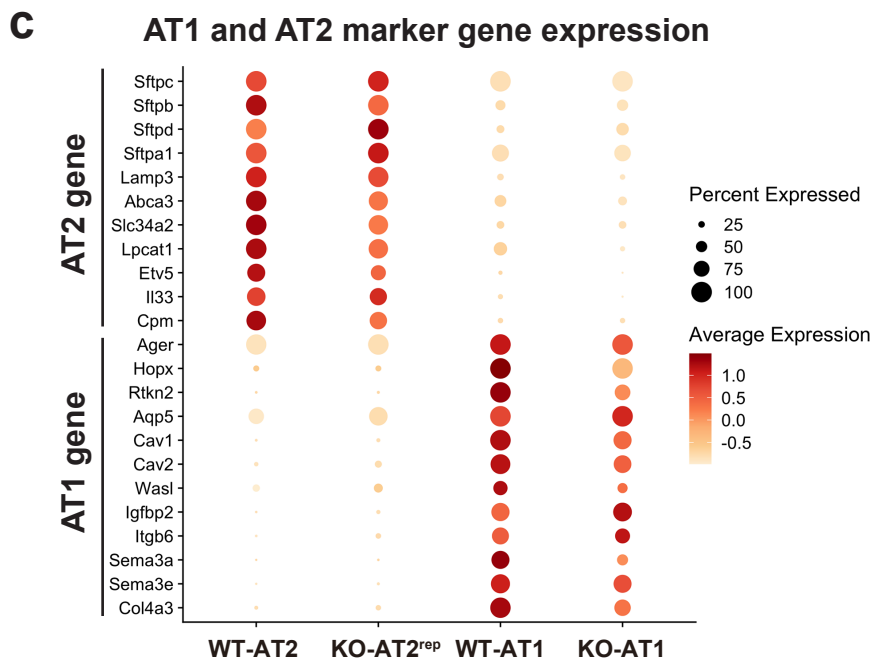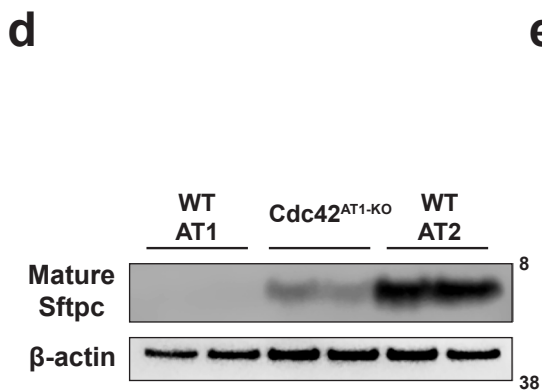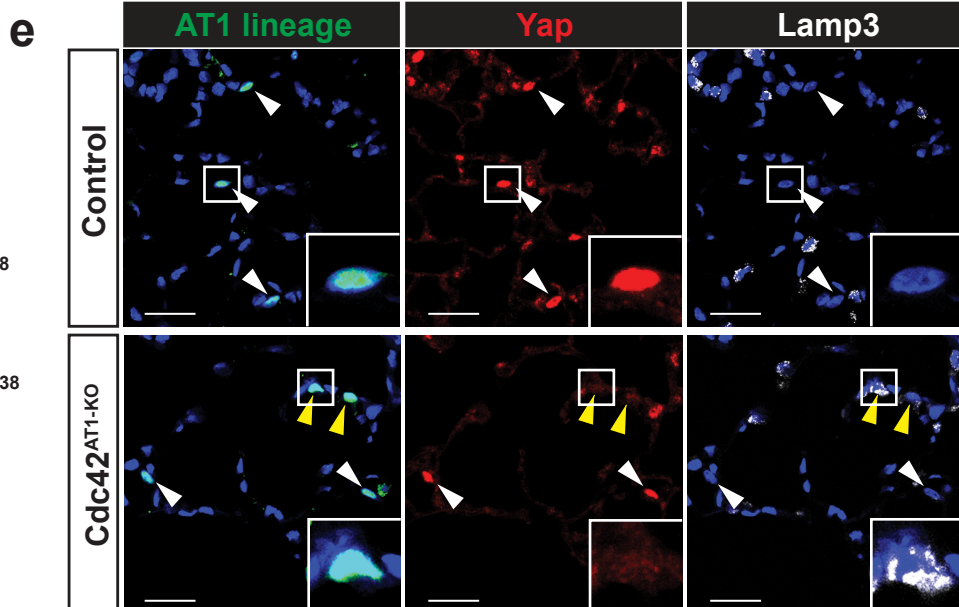

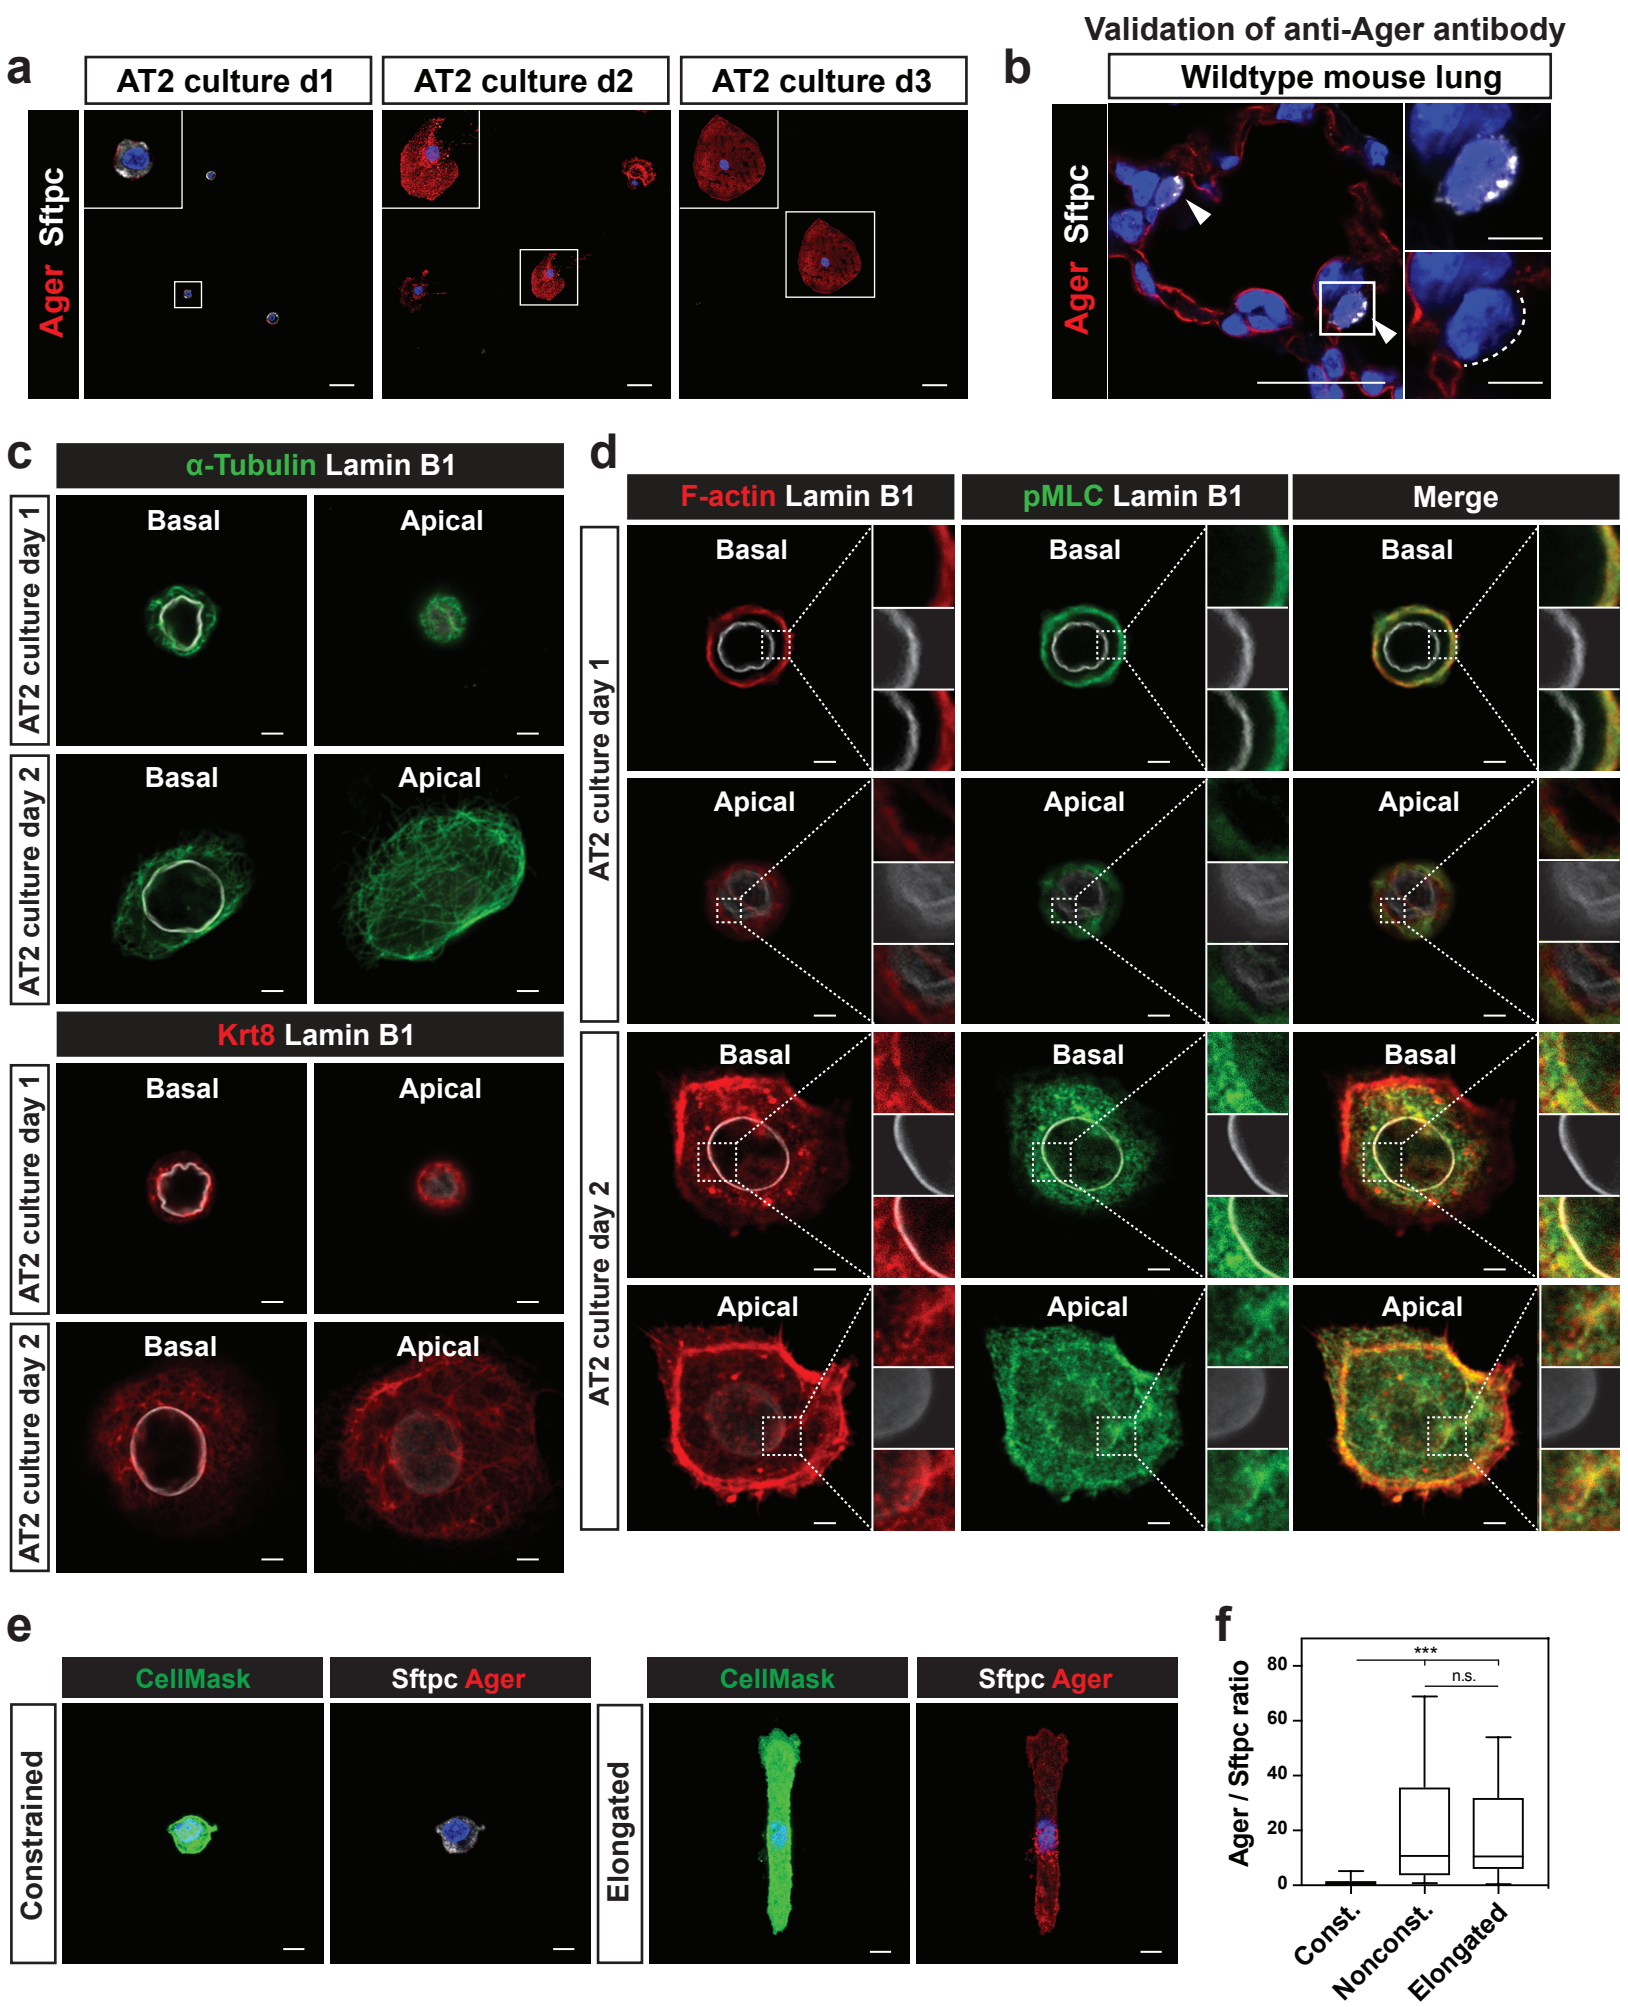

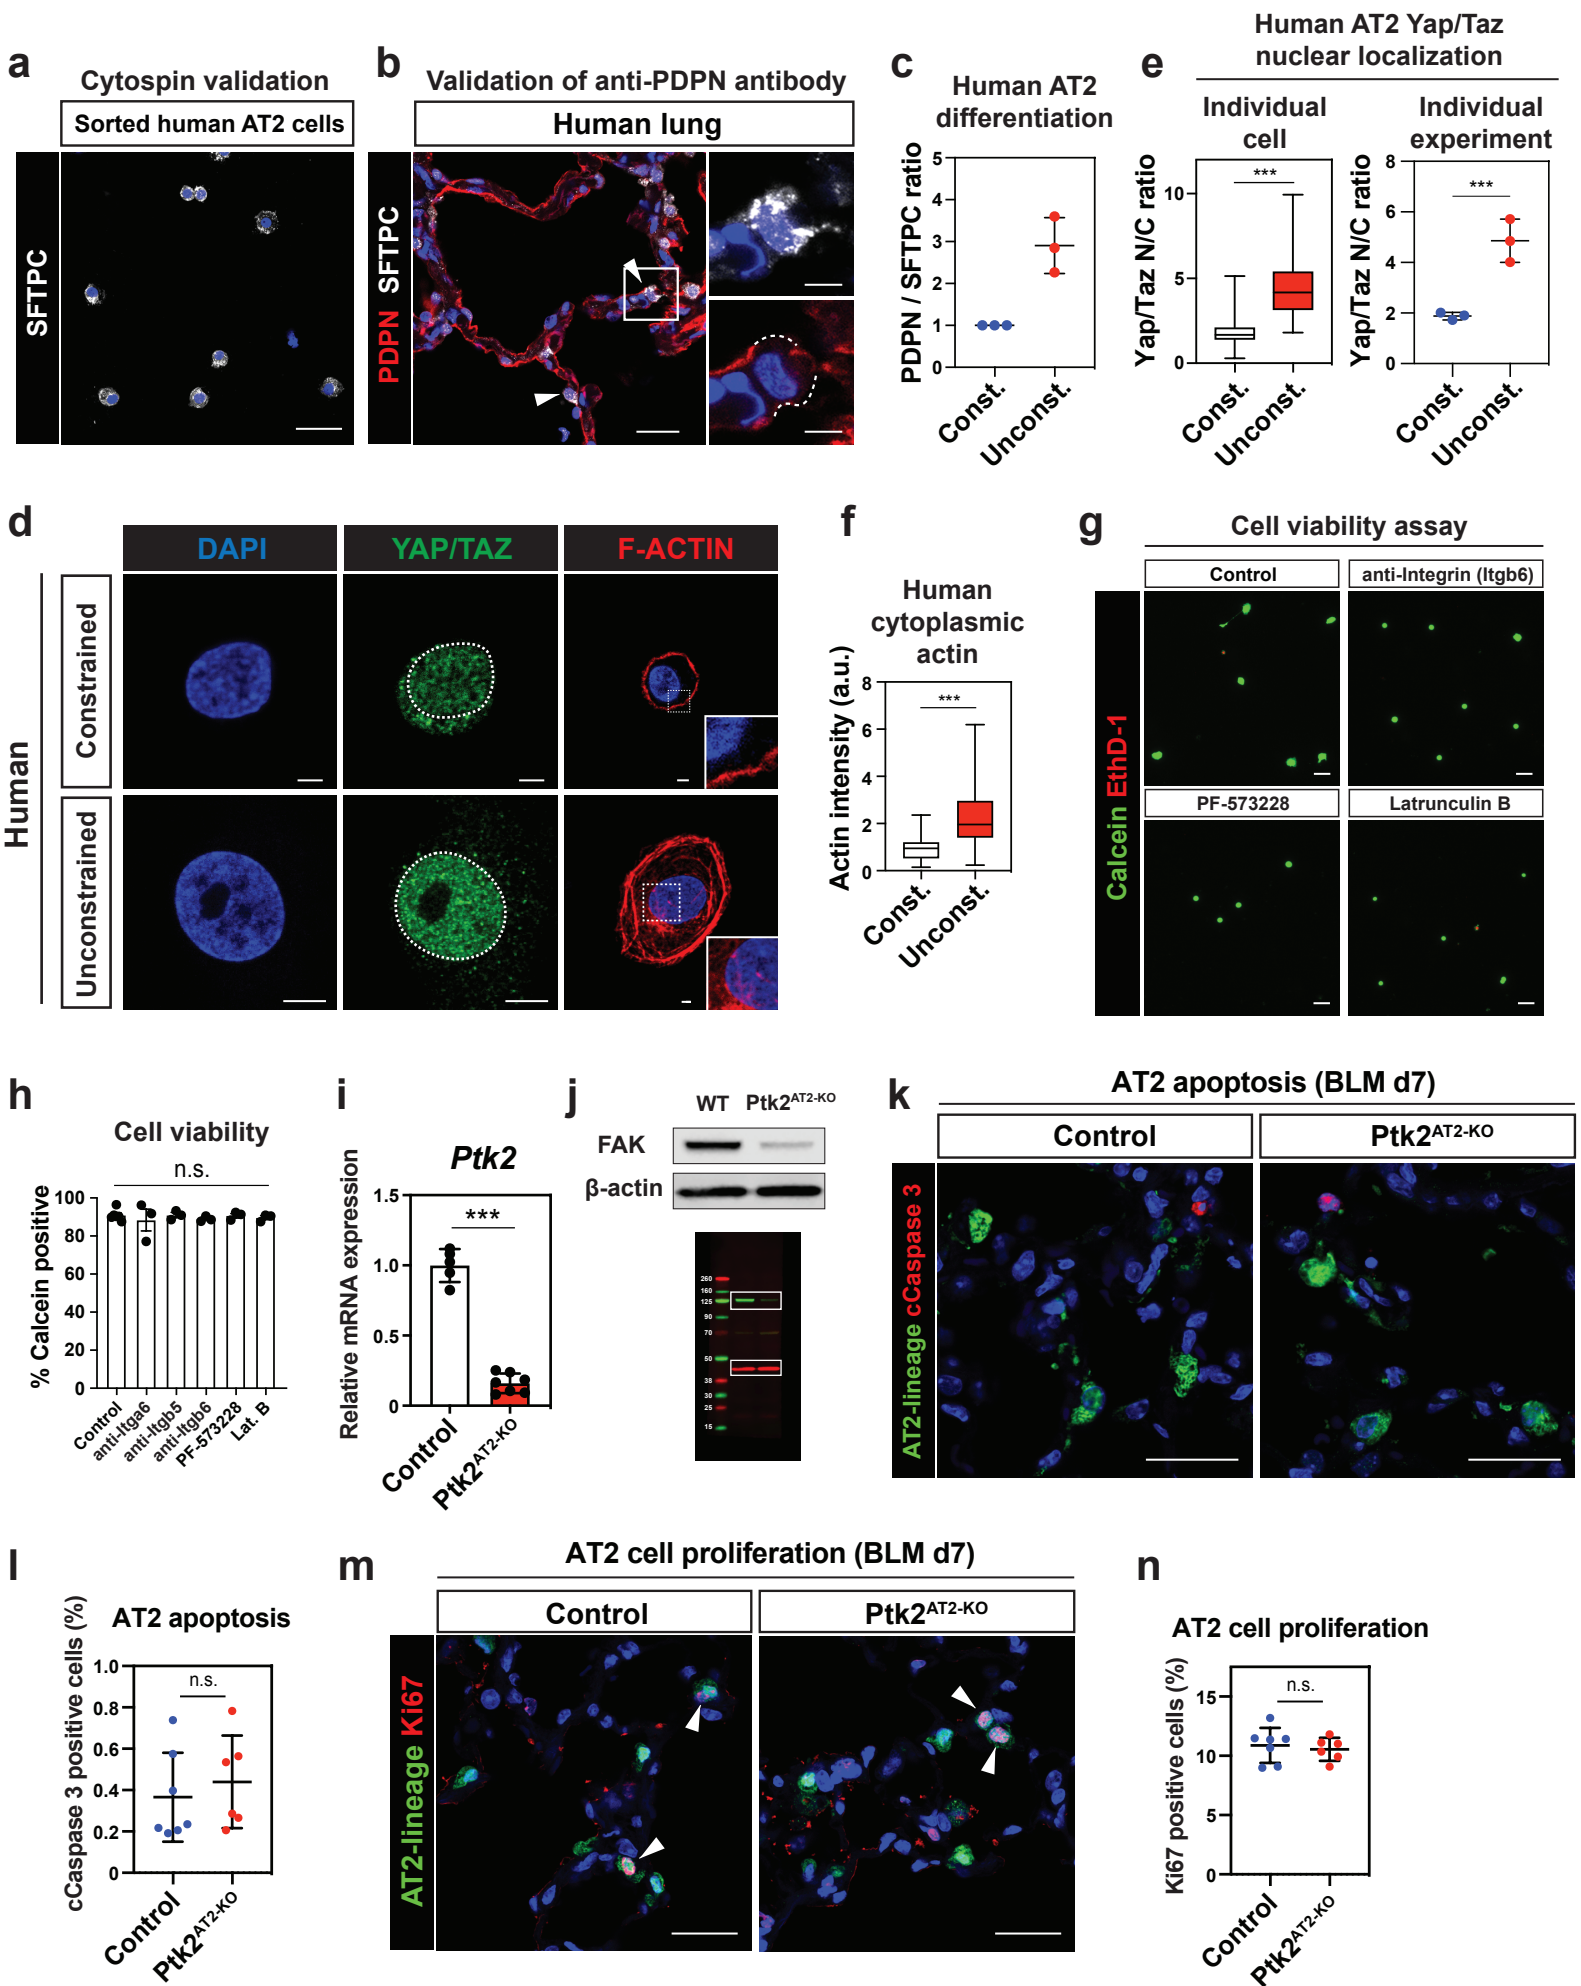



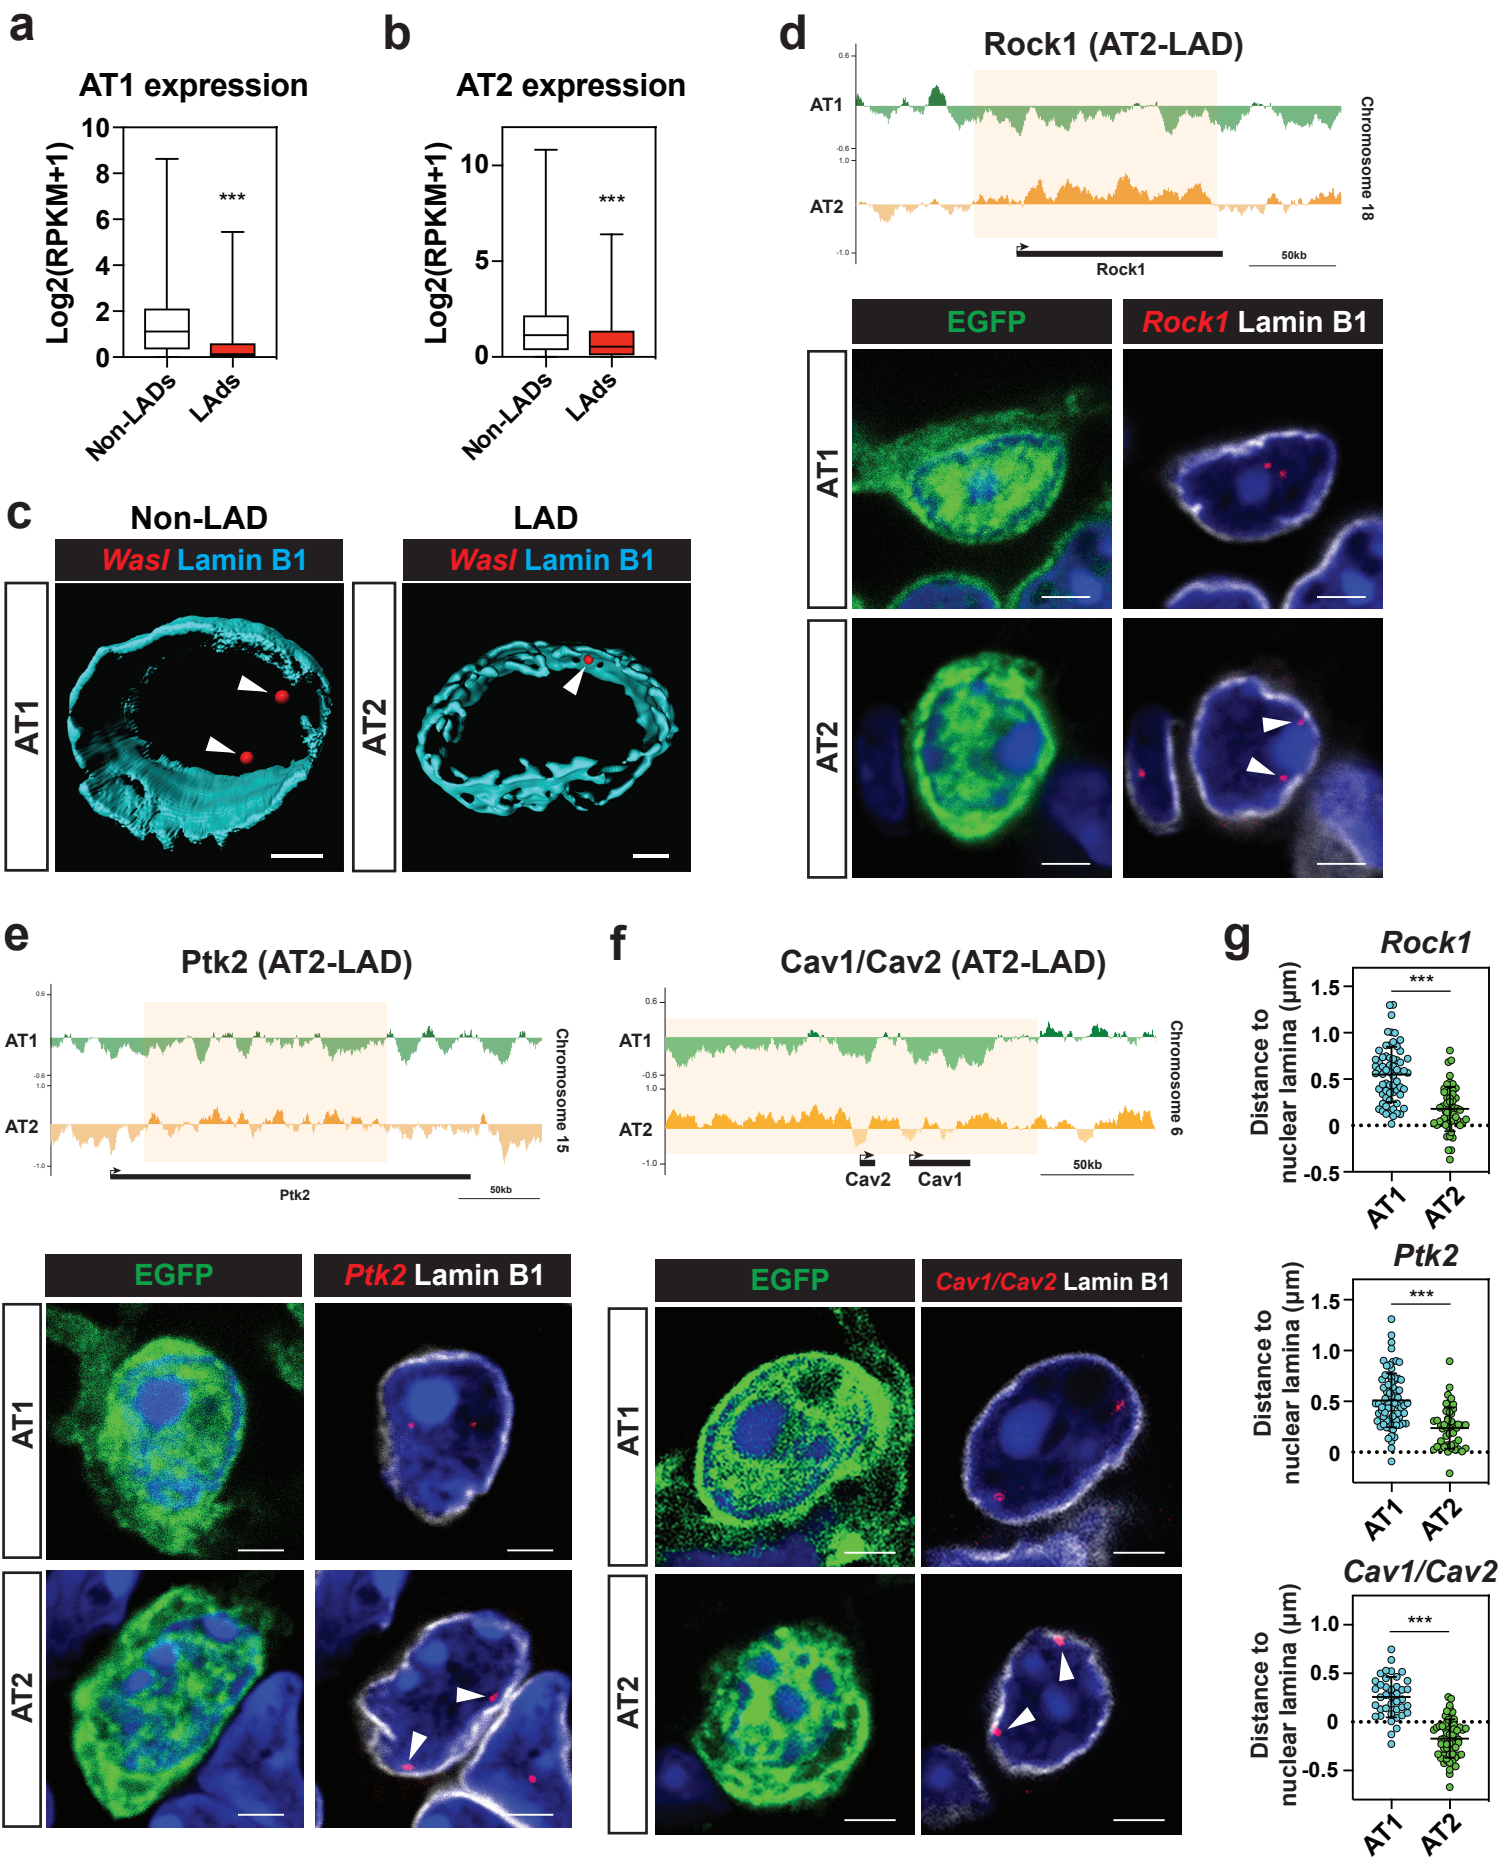



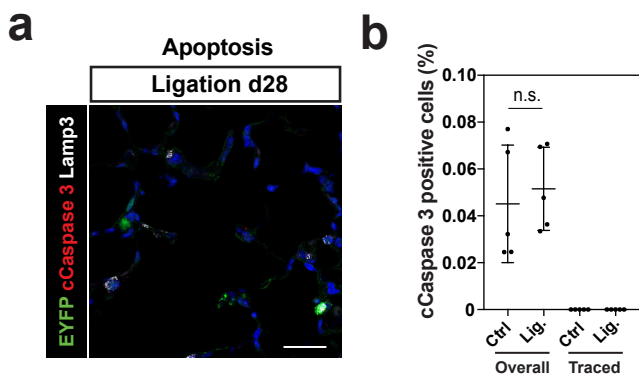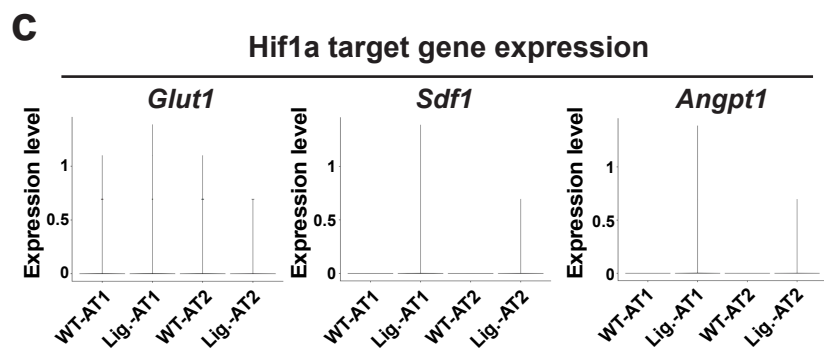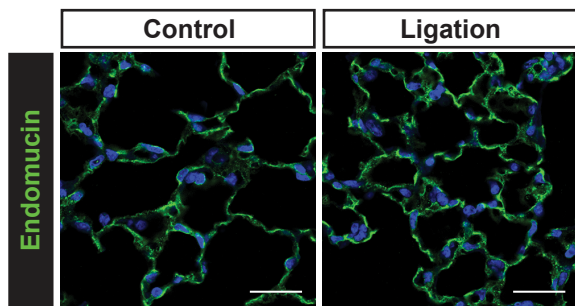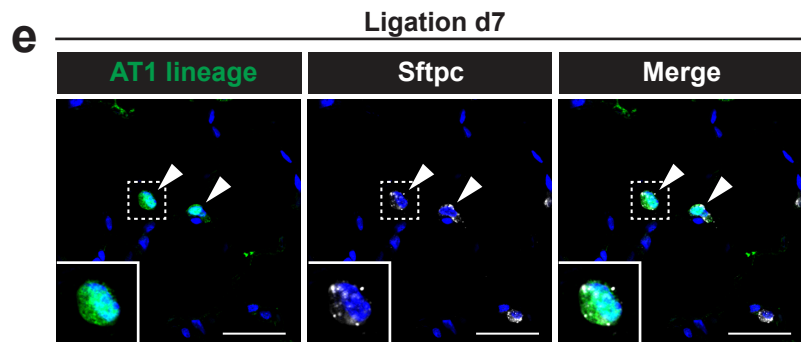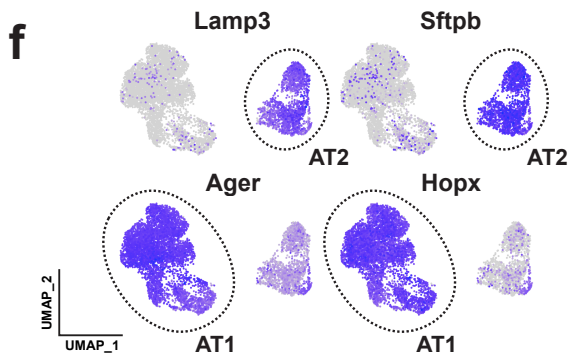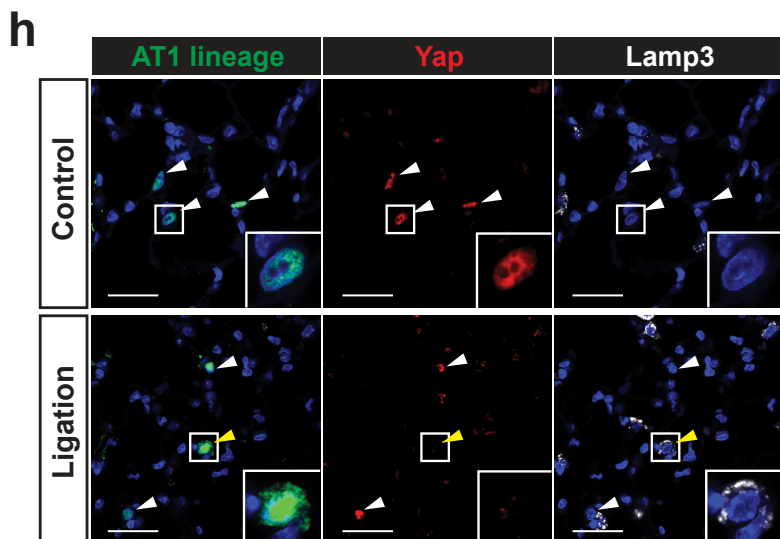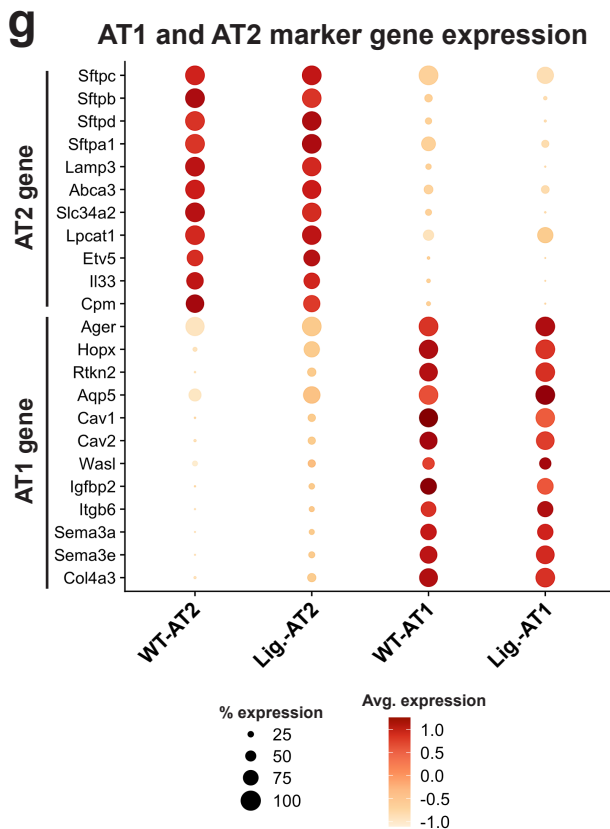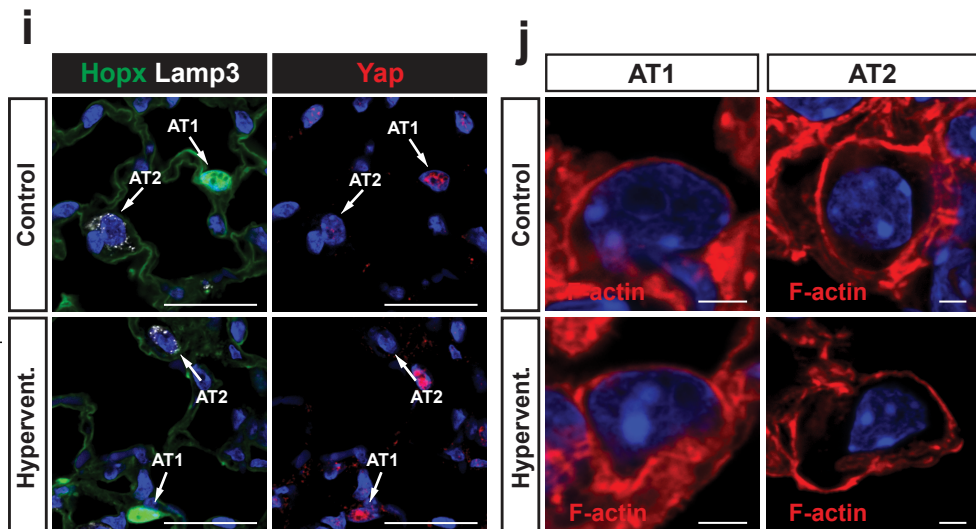

Supplement: NIHMS1875779-supplement-1.pdf [file NIHMS1875779-supplement-1.pdf]
